# Supplementary material for: Radial glia regulate vascular patterning around the developing spinal cord
Source: eLife. 2016 Nov 17;5:e20253. doi: 10.7554/eLife.20253 (PMC5123865; doi:10.7554/eLife.20253)
Supplement: Figure 2—source data 1. — Animals were treated with DMSO or 2 mM Mtz between 30 and 154 hpf, and quantification was performed at 154 hpf (6 animals examined per condition). The number of ECs was counted in the dorsal part of trunks, including the dorsal ISVs, the VTAs, and the DLAVs. The number of ECs was counted in the ventral part of trunks, including the ventral ISVs and the DA. DOI: http://dx.doi.org/10.7554/eLife.20253.006 [file elife-20253-fig2-data1.xlsx]

## Sheet: Sheet1
		The number of ECs in the dorsal and ventral trunk (within 5 ISVs)
		Tg(kdrl:nls-EGFP) fish were crossed into Tg(gfap:NTR) or Tg(elavl3:NTR) fish, then treated with DMSO or 2 mM Mtz between 30 and 154 hpf.
	154 hpf	Dorsal trunk	1	2	3	4		Dorsal trunk
			Tg(gfap:NTR), DMSO	Tg(gfap:NTR), 2mM Mtz	Control, 2mM Mtz	Tg(elavl3:NTR), 2mM Mtz		One-way ANOVA followed by Tukey's HSD test				*** p<0.001
		Larva 1	59	82	66	56		Tukey's multiple comparison test			significant? P < 0.05?	Summary
		Larva 2	60	75	53	55		1 vs 2			Yes	***
		Larva 3	54	92	61	62		1 vs 3			No	ns
		Larva 4	64	70	59	51		1 vs 4			No	ns
		Larva 5	62	72	64	61		2 vs 3			Yes	***
		Larva 6	52	92	58	56		2 vs 4			Yes	***
		Average	58.5	80.5	60.1667	56.8333		3 vs 4			No	ns
		SD	4.63681	9.79285	4.62241	4.07022
		n	6	6	6	6
		SE	1.89297	3.99792	1.88709	1.66166
	154 hpf	Ventral trunk	1	2	3	4		Ventral trunk
			Tg(gfap:NTR), DMSO	Tg(gfap:NTR), 2mM Mtz	Control, 2mM Mtz	Tg(elavl3:NTR), 2mM Mtz		One-way ANOVA followed by Tukey's HSD test
		Larva 1	76	69	80	72		Tukey's multiple comparison test			significant? P < 0.05?	Summary
		Larva 2	69	64	70	72		1 vs 2			No	ns
		Larva 3	66	73	72	65		1 vs 3			No	ns
		Larva 4	70	75	74	65		1 vs 4			No	ns
		Larva 5	68	61	72	65		2 vs 3			No	ns
		Larva 6	73	84	74	66		2 vs 4			No	ns
		Average	70.3333	71	73.6667	67.5		3 vs 4			No	ns
		SD	3.61478	8.27043	3.4448	3.50714
		n	6	6	6	6		P value	0.1062	One-way ANOVA
