# Supplementary material for: Radial glia regulate vascular patterning around the developing spinal cord
Source: eLife. 2016 Nov 17;5:e20253. doi: 10.7554/eLife.20253 (PMC5123865; doi:10.7554/eLife.20253)
Supplement: Figure 4—source data 1. — The number of aISVs and vISVs was quantified at 154 hpf in control and Tg(hsp70l:sflt4); Tg(kdrl:EGFP) fish, which were given no heat shock or multiple heat shocks at 29, 36, and 43 hpf. The 10 ISVs directly anterior to the anal opening on both sides of the body (total 20 ISVs) were used for quantification (18–23 animals examined per condition). DOI: http://dx.doi.org/10.7554/eLife.20253.013 [file elife-20253-fig4-data1.xlsx]

## Sheet: Sheet1
	The number of vISVs out of total 20 ISVs (10 ISVs on both sides of the body) from the caudal edge of the anal opening.
	Tg(kdrl:EGFP) fish were crossed into Tg(hsp70l:sflt4) fish, and collected embryos were given no heat shock (HS) or multiple heat shocks at 29, 36, and 43 hpf.
	154 hpf	Tg(Hsp70l:sflt4) without HS	Tg(Hsp70l:sflt4) with HS	Control with HS
	Larva 1	12	1	10
	Larva 2	11	1	11
	Larva 3	12	2	9
	Larva 4	14	1	10
	Larva 5	16	2	10
	Larva 6	12	0	11
	Larva 7	11	2	12
	Larva 8	9	1	11
	Larva 9	14	2	11
	Larva 10	11	2	10
	Larva 11	10	4	13
	Larva 12	13	2	12
	Larva 13	10	2	12
	Larva 14	10	2	11
	Larva 15	11	1	12
	Larva 16	11	2	9
	Larva 17	11	1	11
	Larva 18	10	3	10
	Larva 19		2
	Larva 20		2
	Larva 21		2
	Larva 22		1
	Larva 23		2
	Average	11.5556	1.73913	10.8333
	SD	1.75641	0.810016	1.09813
	n	18	23	18
	SE	0.413989	0.1689	0.258831
	Percentage	%	%	%
	vISVs	57.7778	8.69565	54.1667
	aISVs	42.2222	91.3043	45.8333
