# Supplementary material for: Radial glia regulate vascular patterning around the developing spinal cord
Source: eLife. 2016 Nov 17;5:e20253. doi: 10.7554/eLife.20253 (PMC5123865; doi:10.7554/eLife.20253)
Supplement: Figure 7—source data 1. — Animals were treated with DMSO or 50 µM Mtz between 30 and 154 hpf, and quantification was performed at 154 hpf (10 somites examined per animal; 23–33 animals examined per condition). DOI: http://dx.doi.org/10.7554/eLife.20253.019 [file elife-20253-fig7-data1.xlsx]

## Sheet: Sheet1
	The number of somites with ectopic blood vessels (total 10 somites)
154 hpf	flt1 +/+	flt1 bns29/+	flt1 +/+, Tg(gfap:NTR) 50 μM Mtz	flt1 bns29/+, Tg(gfap:NTR) 50 μM Mtz
Larva 1	0	2	5	0
Larva 2	2	1	0	5
Larva 3	0	0	2	2
Larva 4	0	3	0	1
Larva 5	1	0	0	3
Larva 6	0	0	0	4
Larva 7	0	0	0	1
Larva 8	0	5	5	8
Larva 9	0	0	2	0
Larva 10	0	0	0	0
Larva 11	0	0	2	2
Larva 12	0	3	0	2
Larva 13	0	0	1	3
Larva 14	0	0	1	1
Larva 15	0	0	0	6
Larva 16	0	2	0	9
Larva 17	3	1	1	0
Larva 18	0	0	2	4
Larva 19	0	0	1	5
Larva 20	0	0	3	1
Larva 21	0	0	0	7
Larva 22	0	1	1	3
Larva 23	0	7	0	4
Larva 24		0	2	6
Larva 25		0	2	1
Larva 26			0	0
Larva 27			2	4
Larva 28			4	2
Larva 29			3	2
Larva 30			1	3
Larva 31				6
Larva 32				4
Larva 33				5
Average	0.26087	1	1.33333	3.15152
SD	0.751809	1.80278	1.49328	2.43825
n	23	25	30	33
SE	0.156763	0.360555	0.272634	0.424445
