# Supplementary material for: Radial glia regulate vascular patterning around the developing spinal cord
Source: eLife journal article supplement (doi:10.7554/elife.20253), 2016-11-17
Supplement: supp [file elife-20253-supp-v1.zip]

CRISPR gRNA design for generating *flt1 bns29* mutant allele

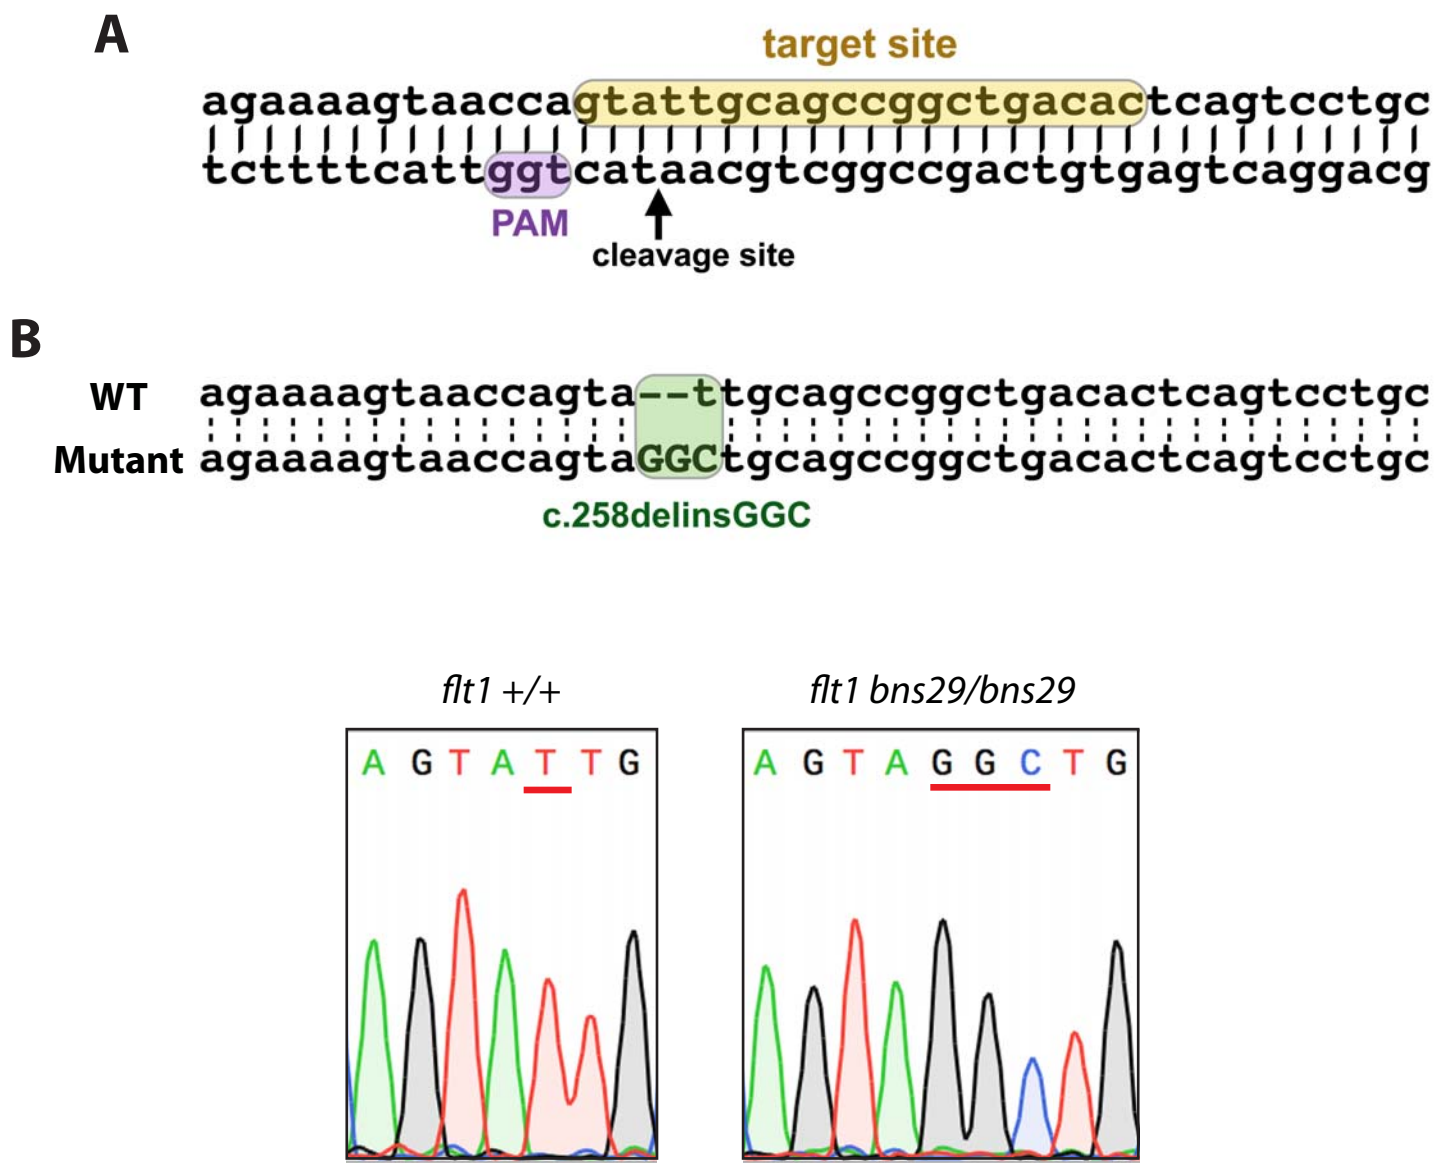

Figure 5 - figure supplement 1 Matsuoka et al.
