# Supplementary figures and images for: Radial glia regulate vascular patterning around the developing spinal cord
Source: eLife journal article supplement (doi:10.7554/elife.20253), 2016-11-17

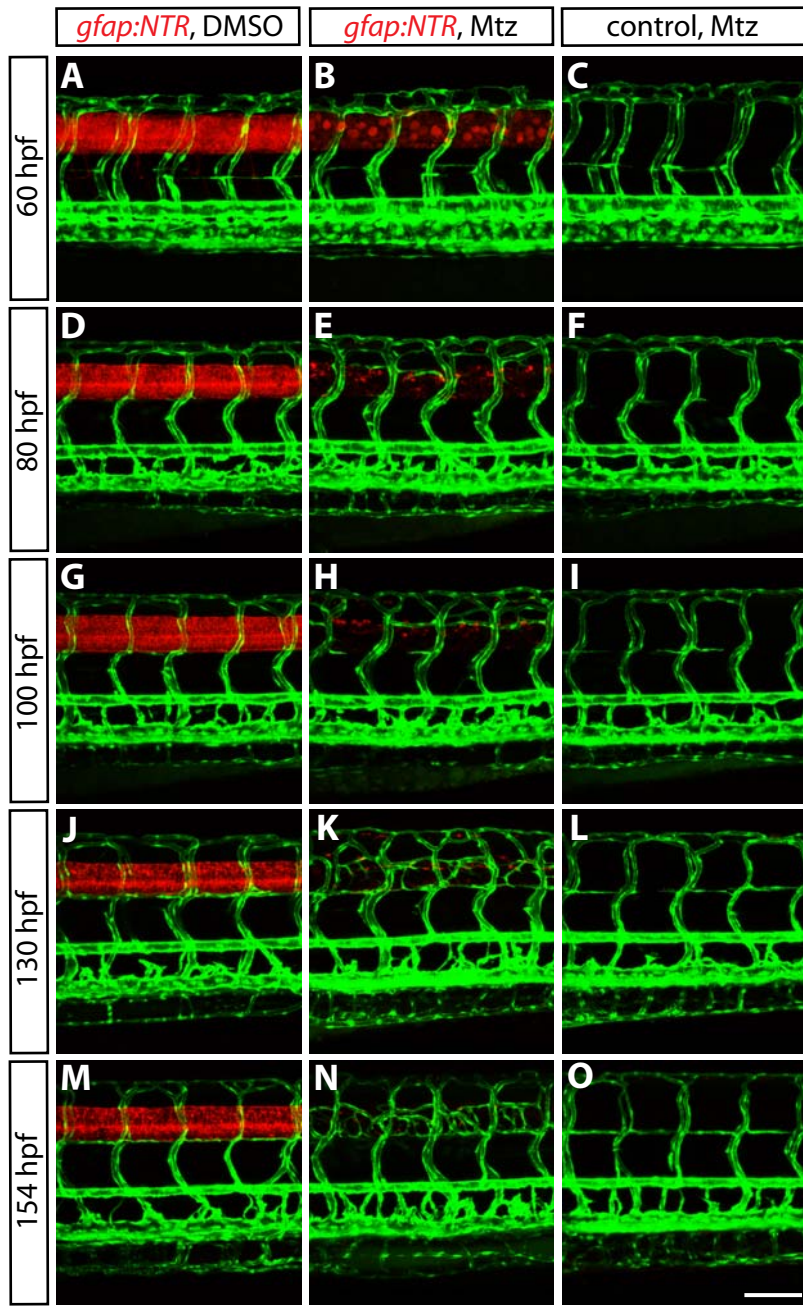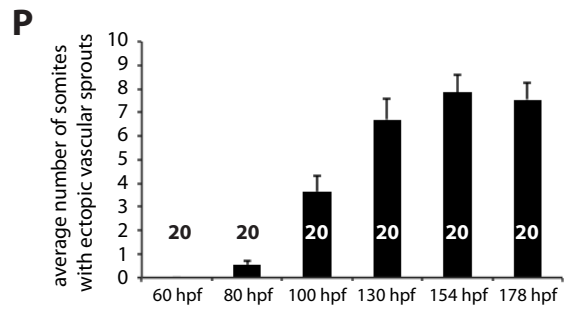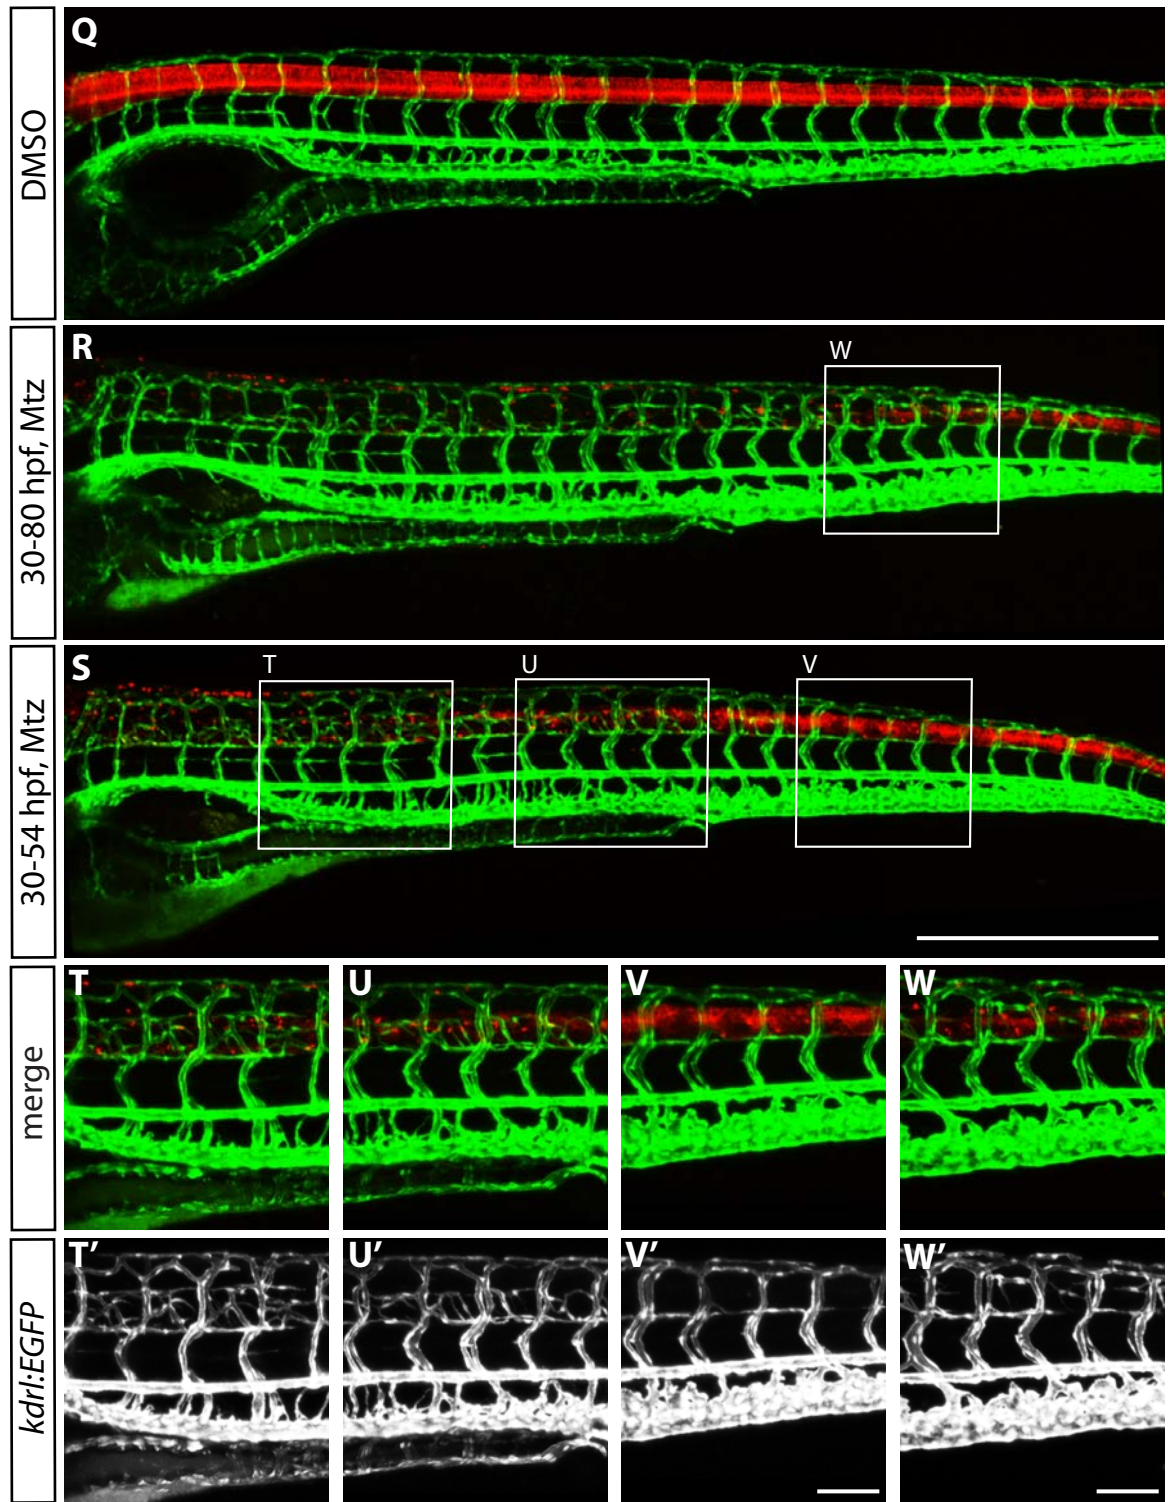

Figure 3 - figure supplement 1 Matsuoka et al.

Supplement: supp [file elife-20253-supp-v1.zip]

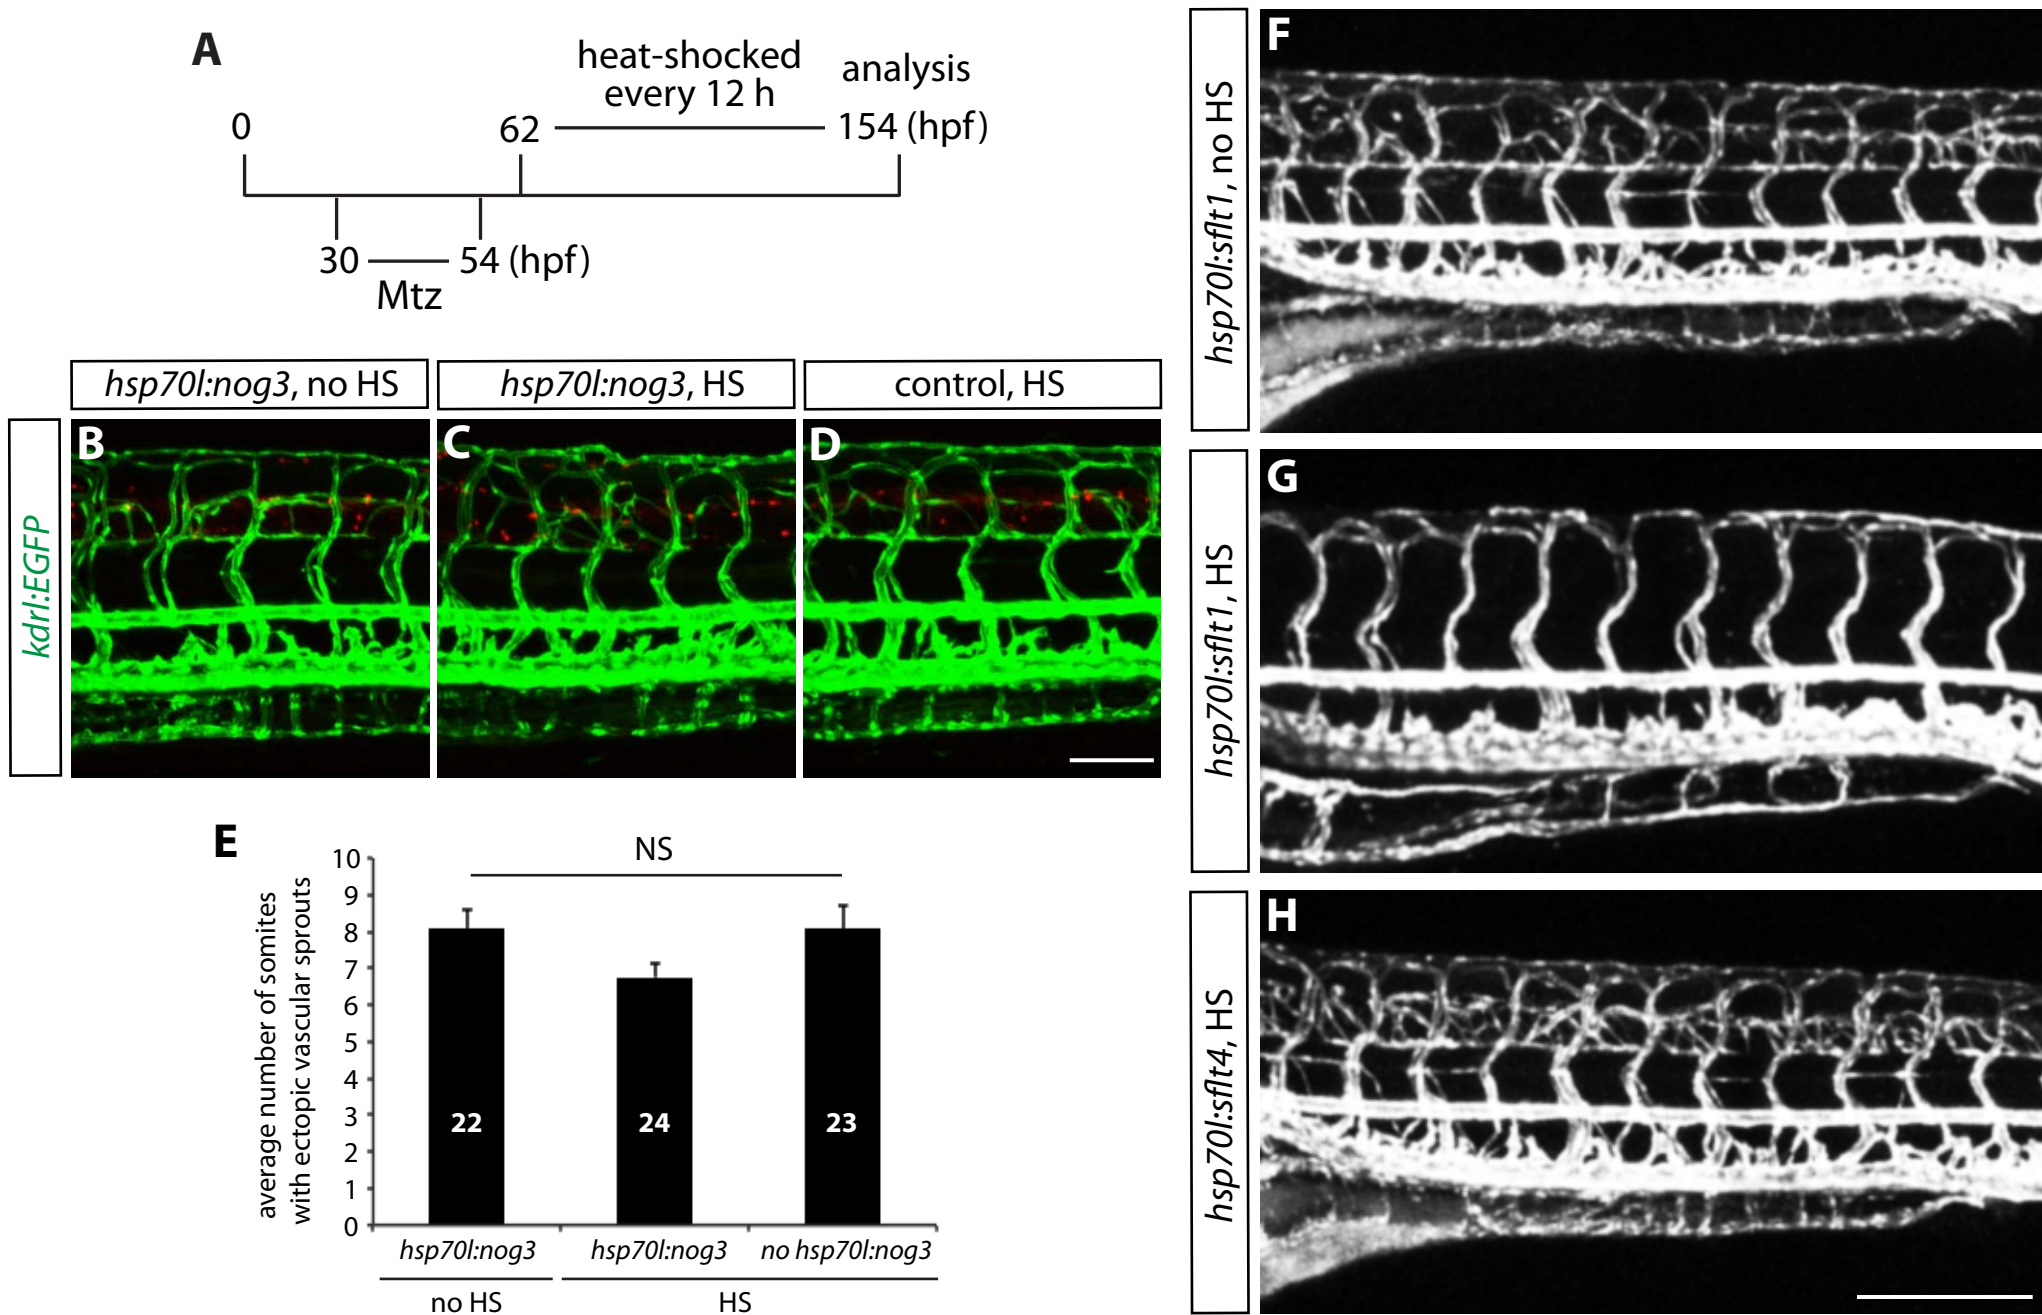

Figure 4 - figure supplement 1 Matsuoka et al.

Supplement: supp [file elife-20253-supp-v1.zip]

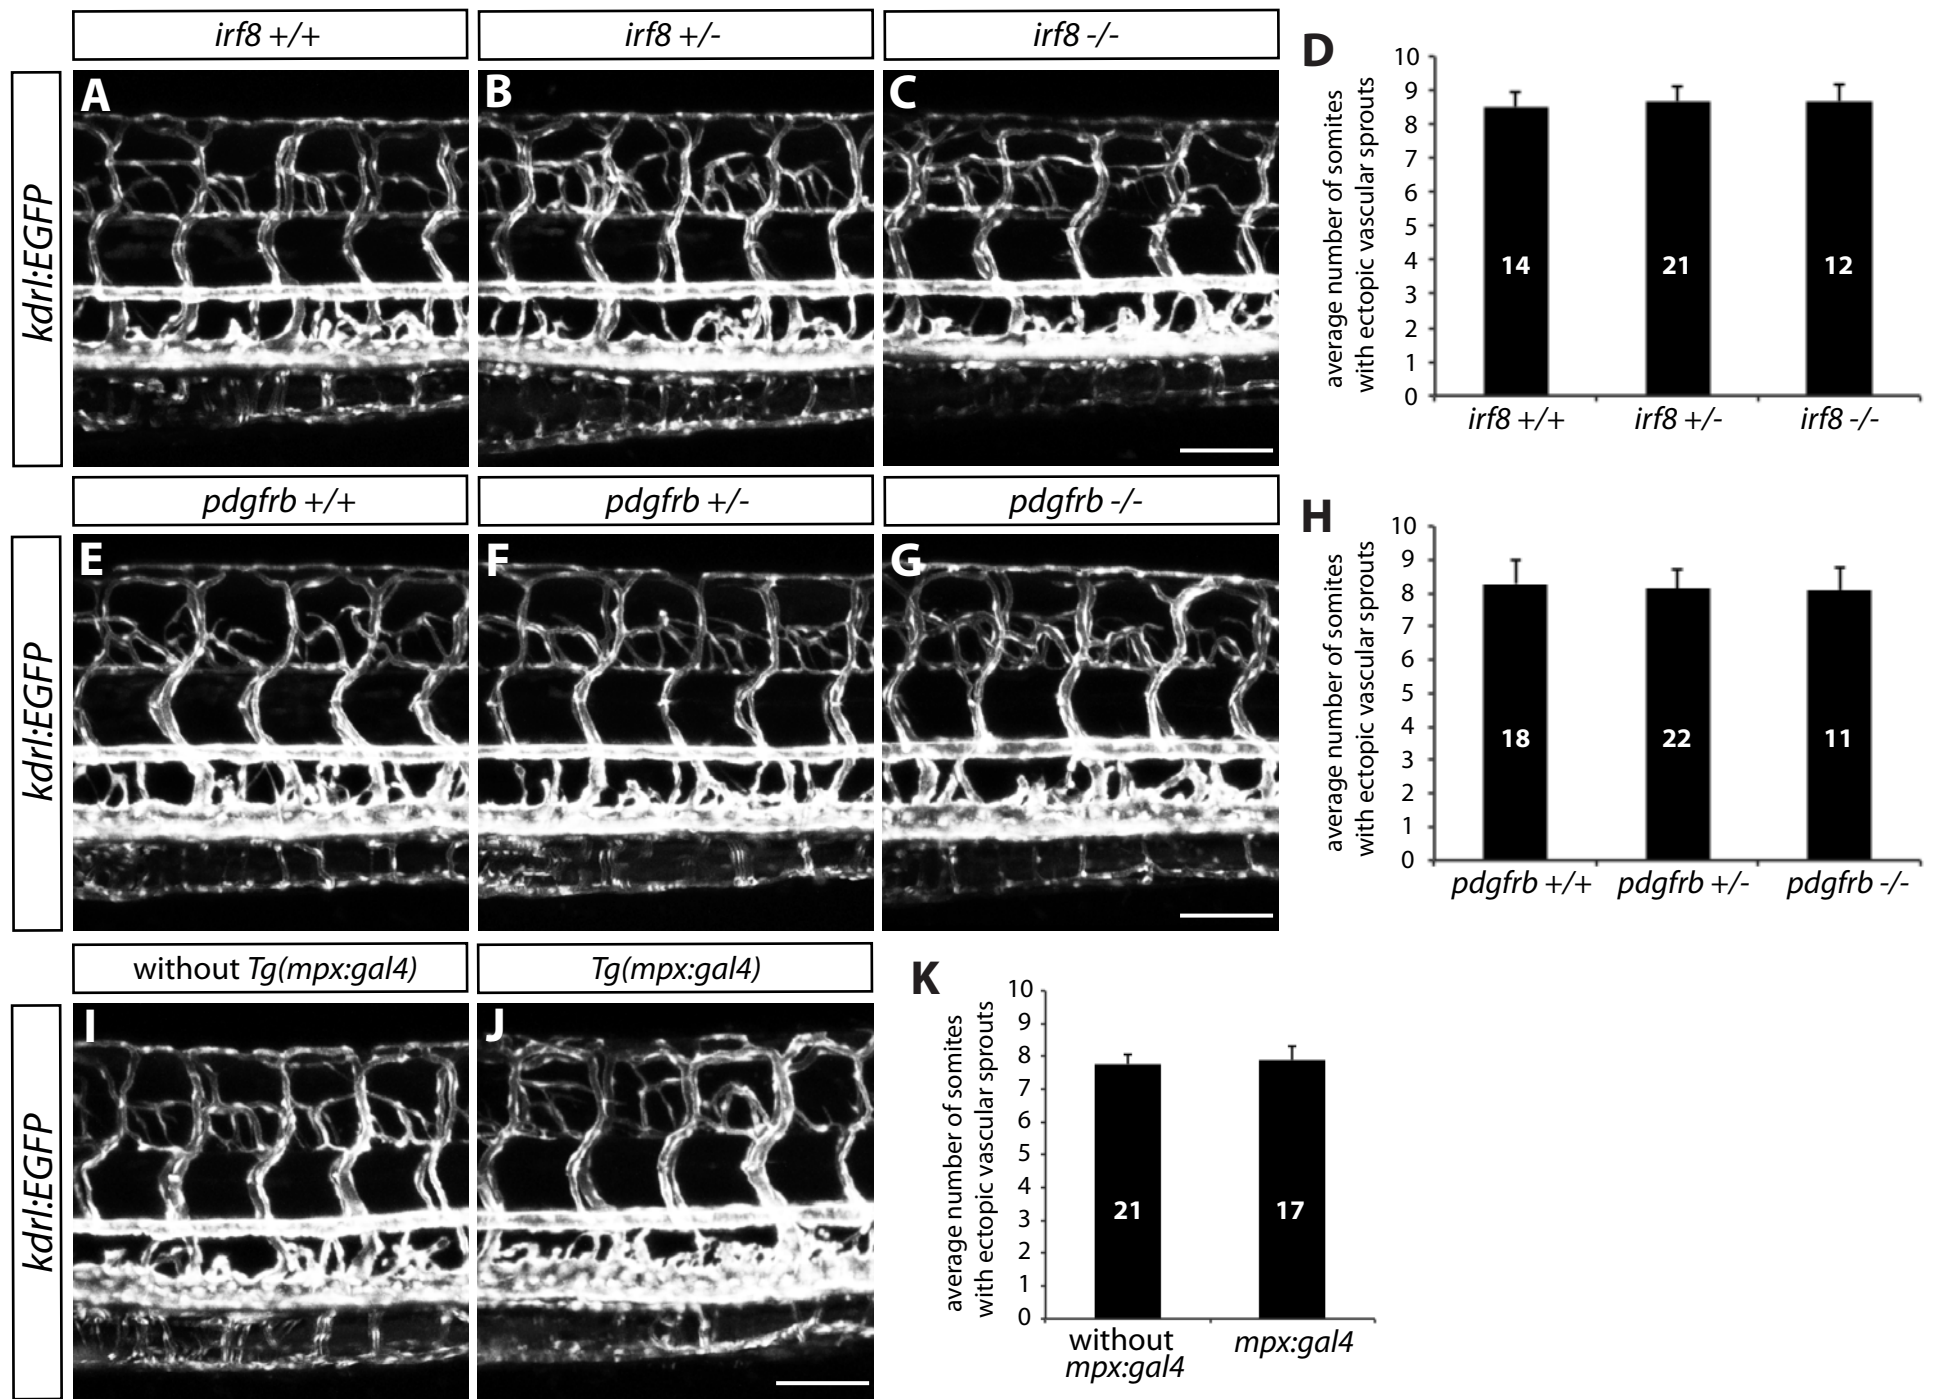

Figure 2 - figure supplement 1 Matsuoka et al.

Supplement: supp [file elife-20253-supp-v1.zip]

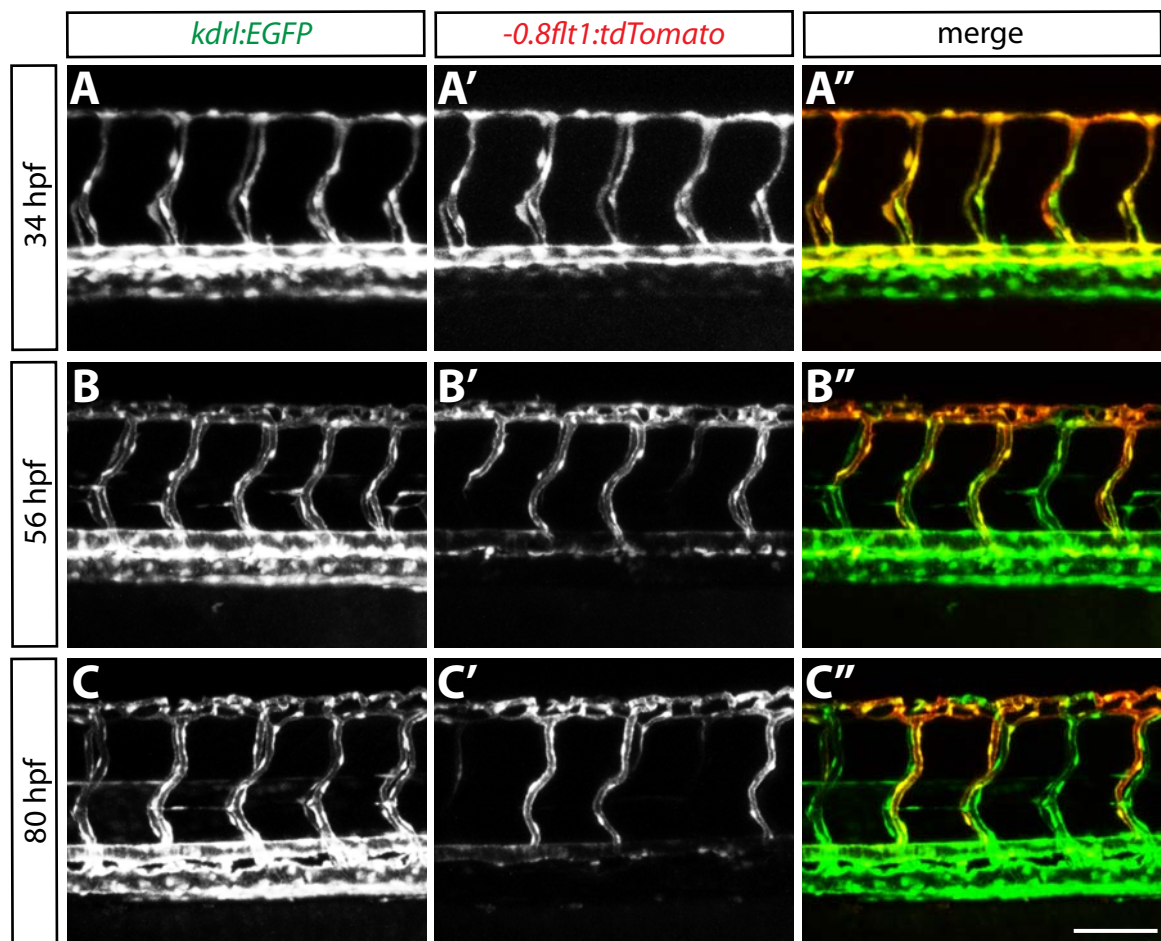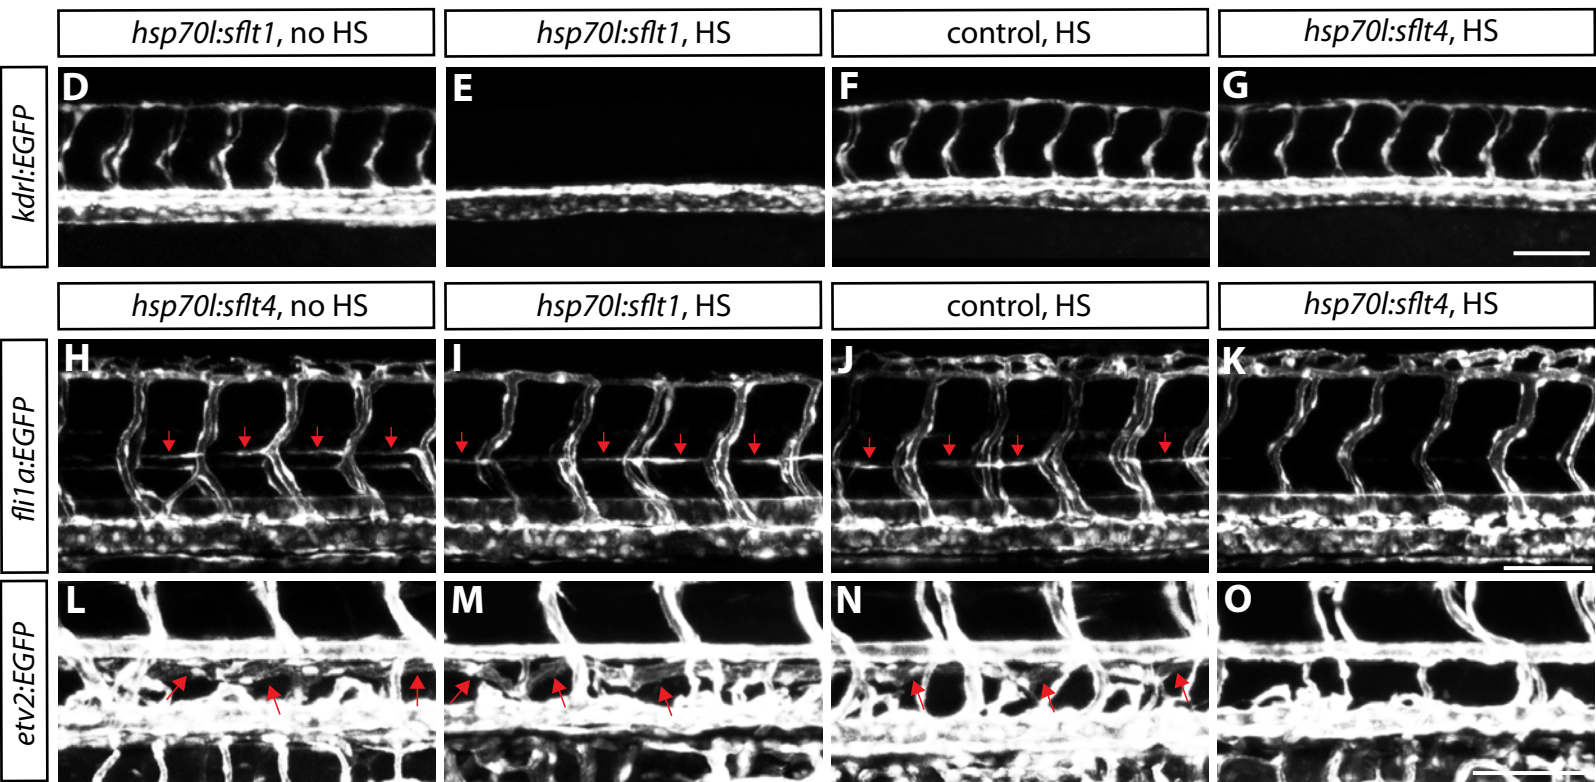

Figure 3 - figure supplement 2 Matsuoka et al.

Supplement: supp [file elife-20253-supp-v1.zip]

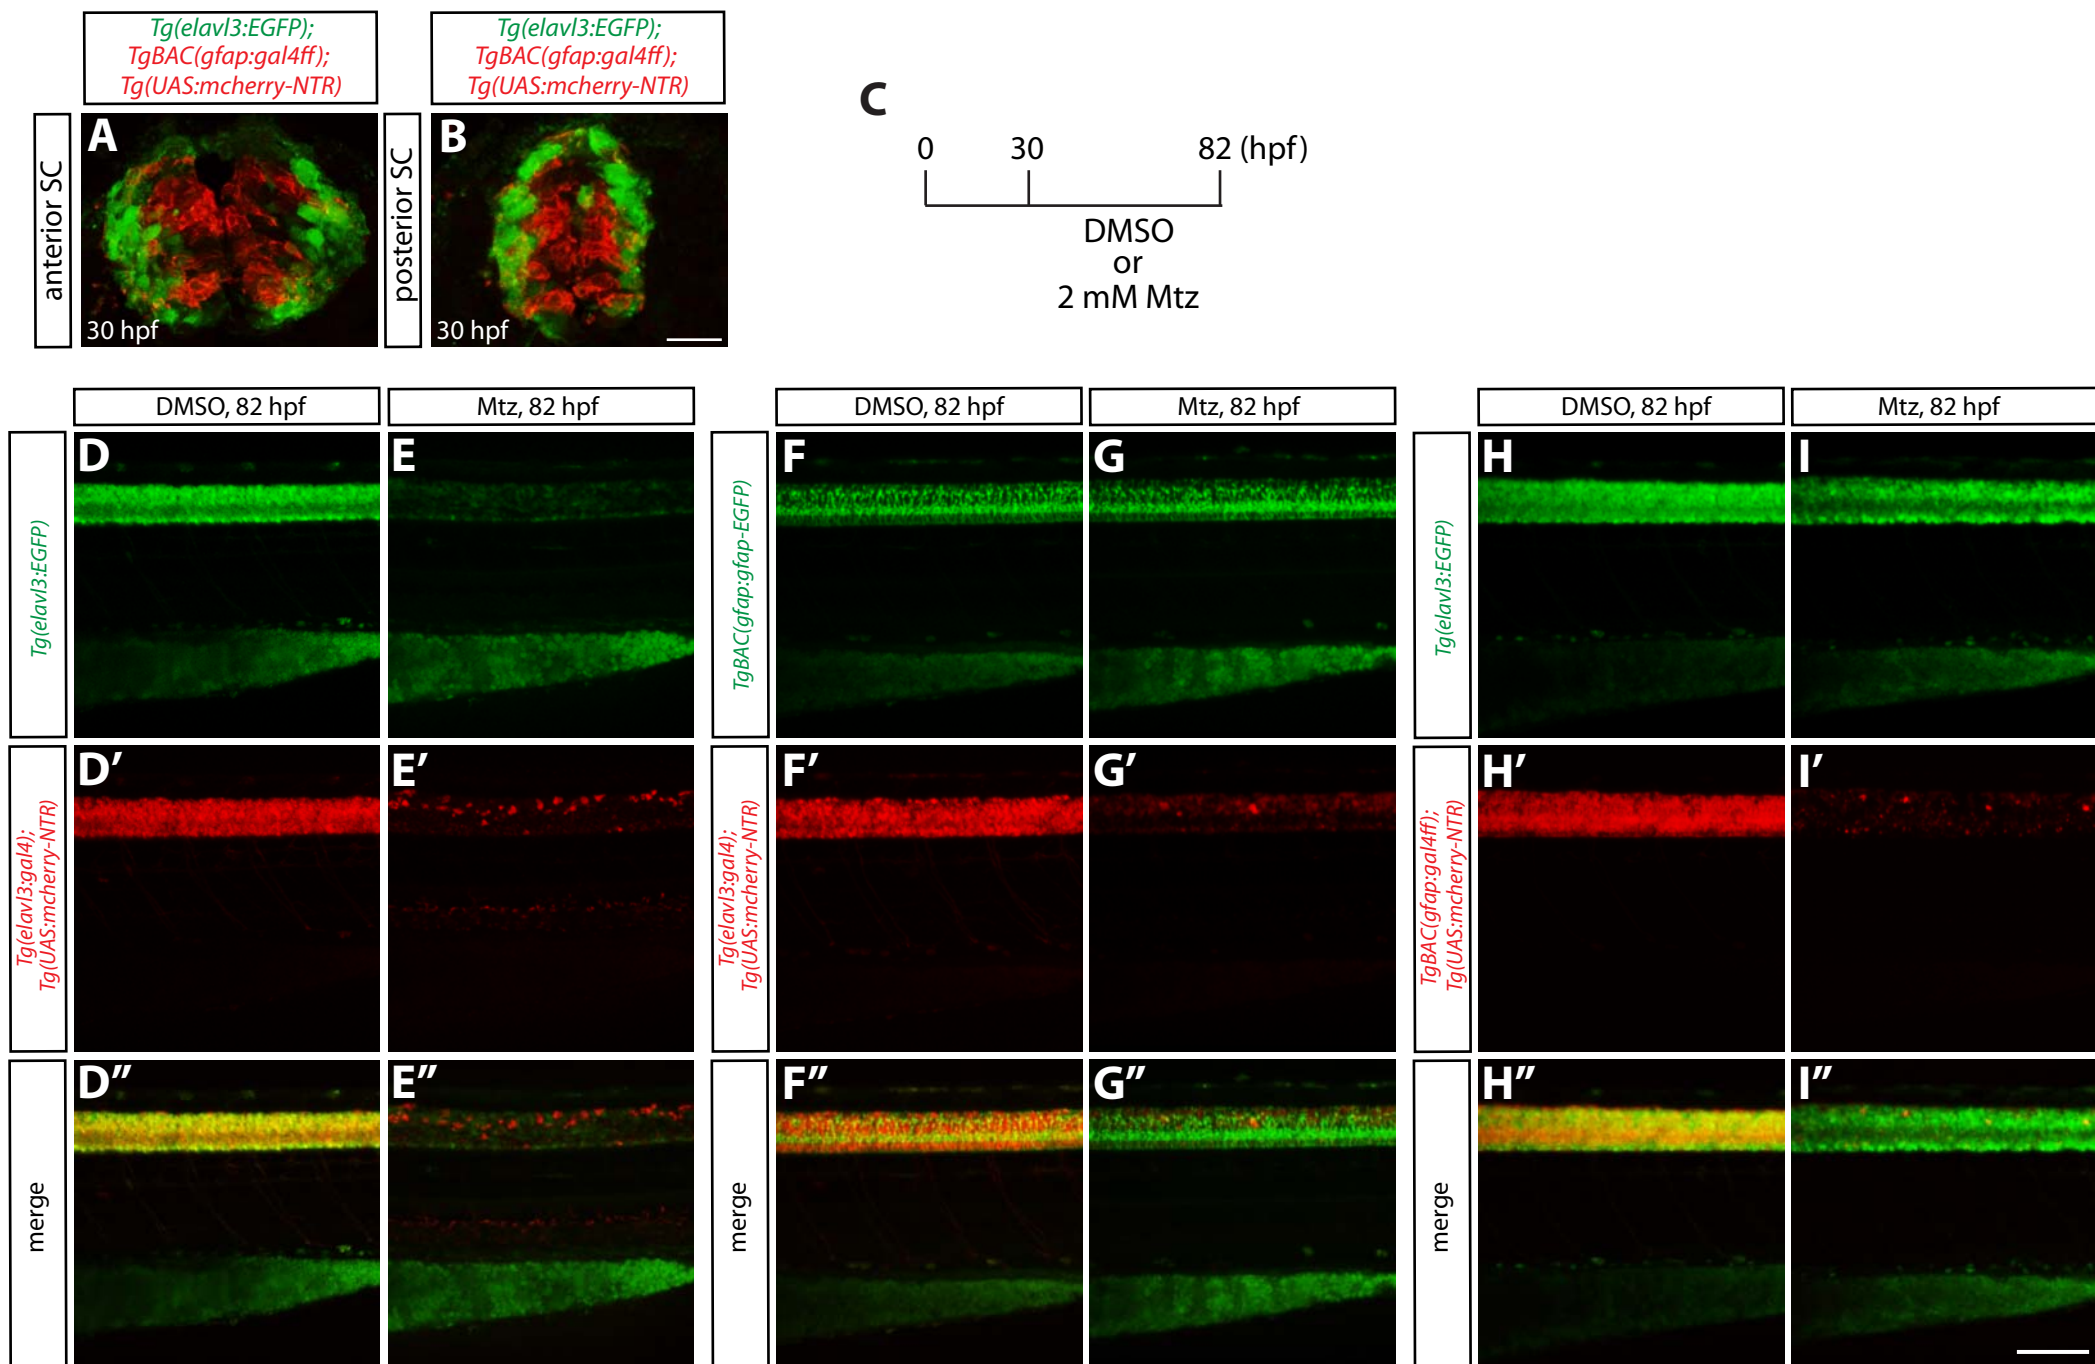

Figure 1 - figure supplement 1 Matsuoka et al.

Supplement: supp [file elife-20253-supp-v1.zip]
